# Supplementary material for: Waterborne LiNi0.5Mn1.5O4 Cathode Formulation Optimization through Design of Experiments and Upscaling to 1 Ah Li-Ion Pouch Cells
Source: MDPI journal article supplement (doi:10.3390/en16217327), 2023-10-29
Supplement: s1 [file s1]

## Supporting information

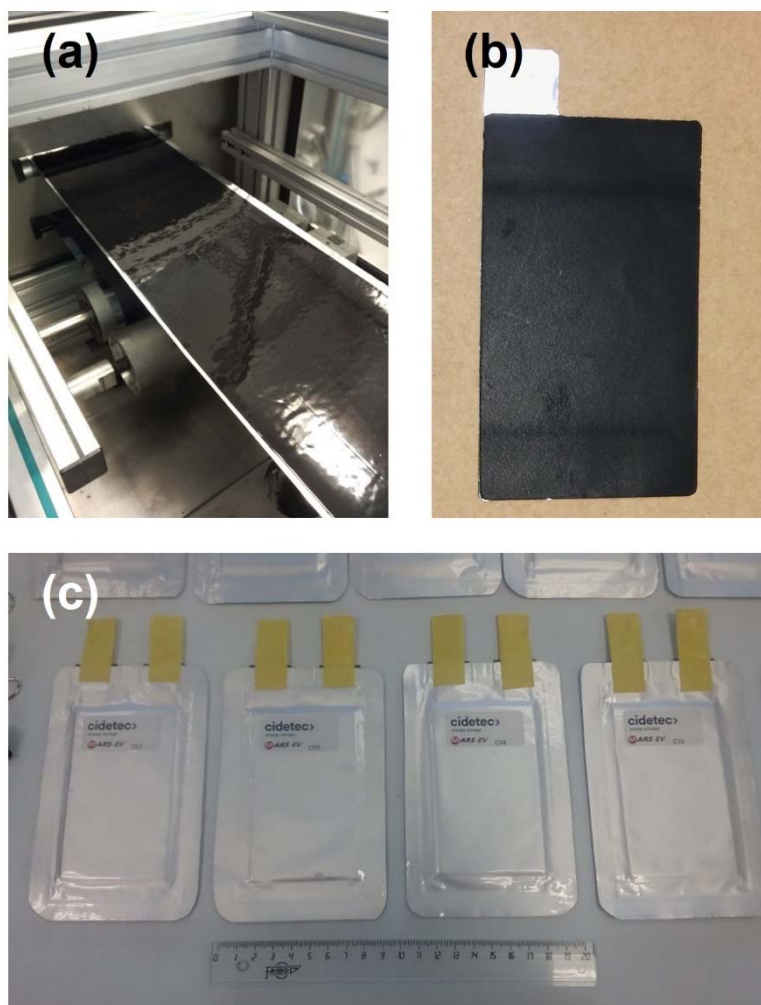

**Figure S1.** Pictures of (a) the cathode coating after passing through the knife, (b) a cathode, and (c) assembled pouch cells.

**Table S1.** Testing protocol applied to the LNMO HCCs.

| Step      | Conditions                                                         | Cycles |
|-----------|--------------------------------------------------------------------|--------|
| Charge    | $0.2C \rightarrow 5 \text{ V/CV} < 0.05C \text{ \& } 2 \text{ s}$  | 3      |
| Discharge | $0.2C \rightarrow 3.5 \text{ V}$                                   |        |
| Charge    | $0.5C \rightarrow 5 \text{ V /CV} < 0.05C \text{ \& } 2 \text{ s}$ | 1      |
| Discharge | $0.5C \rightarrow 3.5 \text{ V}$                                   |        |
| Charge    | $1C \rightarrow 5 \text{ V/CV} < 0.05C \text{ \& } 2 \text{ s}$    | 3      |
| Discharge | $1C \rightarrow 3.5 \text{ V}$                                     |        |
| Charge    | $0.5C \rightarrow 5 \text{ V/CV} < 0.05C \text{ \& } 2 \text{ s}$  | 1      |
| Discharge | $0.5C \rightarrow 3.5 \text{ V}$                                   |        |
| Charge    | $1C \rightarrow 5 \text{ V/CV} < 0.05C \text{ \& } 2 \text{ s}$    | 3      |
| Discharge | $2C \rightarrow 3.5 \text{ V}$                                     |        |
| Charge    | $0.5C \rightarrow 5 \text{ V/CV} < 0.05C \text{ \& } 2 \text{ s}$  | 1      |
| Discharge | $0.5C \rightarrow 3.5V$                                            |        |
| Charge    | $1C \rightarrow 5 \text{ V/CV} < 0.05C \text{ \& } 2 \text{ s}$    | 3      |
| Discharge | $5C \rightarrow 3.5 \text{ V}$                                     |        |
| Charge    | $0.5C \rightarrow 5 \text{ V/CV} < 0.05C \text{ \& } 2 \text{ s}$  | 1      |
| Discharge | $0.5C \rightarrow 3.5 \text{ V}$                                   |        |
| Charge    | $1C \rightarrow 5 \text{ V/CV} < 0.05C \text{ \& } 2 \text{ s}$    | 3      |
| Discharge | $8C \rightarrow 3.5 \text{ V}$                                     |        |
| Charge    | $0.5C \rightarrow 5 \text{ V/CV} < 0.05C \text{ \& } 2 \text{ s}$  | 1      |
| Discharge | $0.5C \rightarrow 3.5 \text{ V}$                                   |        |
| Charge    | $1C \rightarrow 5 \text{ V/CV} < 0.05C \text{ \& } 2 \text{ s}$    | 3      |
| Discharge | $10C \rightarrow 3.5 \text{ V}$                                    |        |
| Charge    | $0.5C \rightarrow 5 \text{ V/CV} < 0.05C \text{ \& } 2 \text{ s}$  | 1      |
| Discharge | $0.5C \rightarrow 3.5 \text{ V}$                                   |        |
| Charge    | $1C \rightarrow 5 \text{ V/CV} < 0.05C \text{ \& } 2 \text{ s}$    | 3      |
| Discharge | $1C \rightarrow 3.5 \text{ V}$                                     |        |

**Table S2.** Components of the positive electrodes and upper and lower limits defined for the optimization of the slurry.

| Component    | Weight fraction, wt% |             |
|--------------|----------------------|-------------|
|              | Lower limit          | Upper limit |
| LNMO         | 89                   | 91          |
| Carbon black | 4                    | 6           |
| CMC          | 2                    | 3           |
| Binder       | 2                    | 3           |

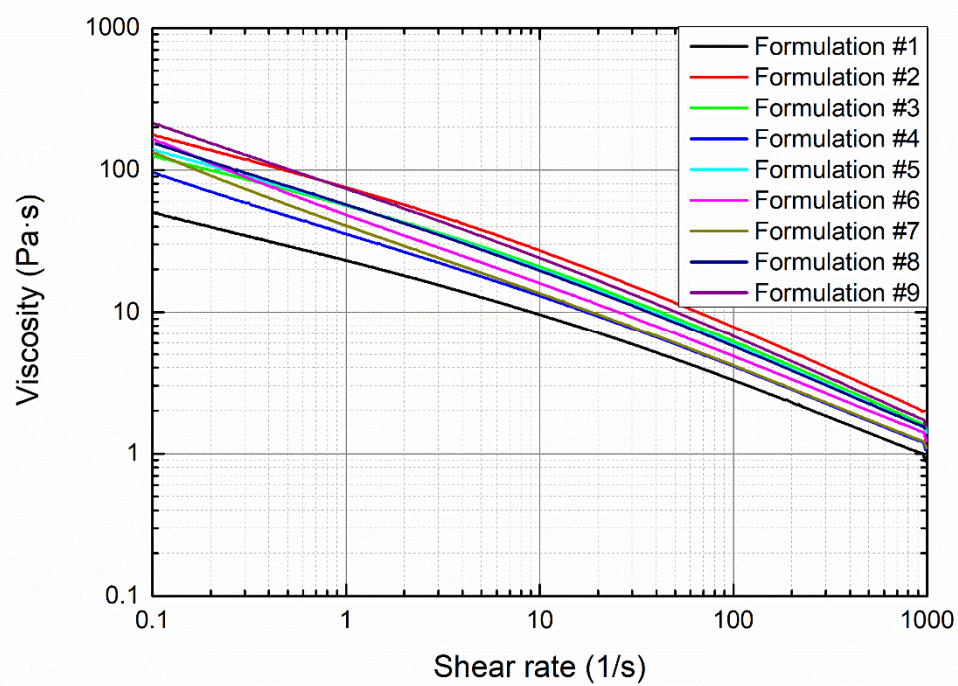

**Figure S2.** Rheological studies with the different formulations: viscosity vs. shear rate curves.

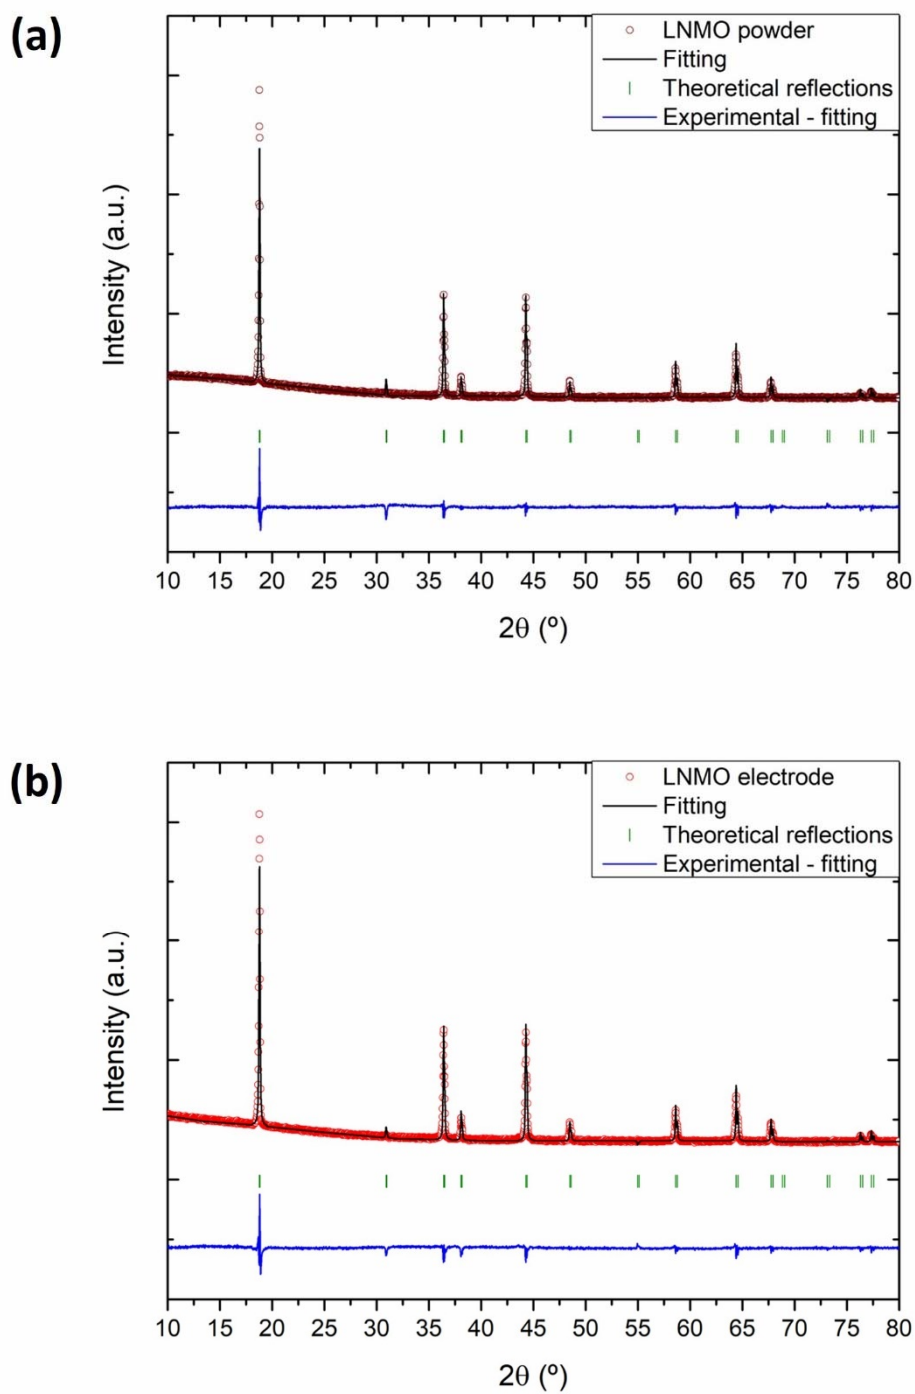

**Figure S3.** X-ray diffraction patterns of the (a) LNMO powder and (b) a LNMO electrode. Patterns were fitted to LNMO phase using FULLPROF software and its theoretical reflections and the difference between the experimental and the fitting curves are included.

LNMO powder and LNMO electrodes were subjected to XRD analysis. The patterns obtained were fitted using cation-disordered structure with face-centered cubic symmetry (space group  $Fd\bar{3}m$ ).  $a = 8.17731$  and  $8.17666$  Å unit cell parameters were obtained for the LNMO powder and electrode, respectively, evidencing negligible influence of the processing of the material on its crystal structure.

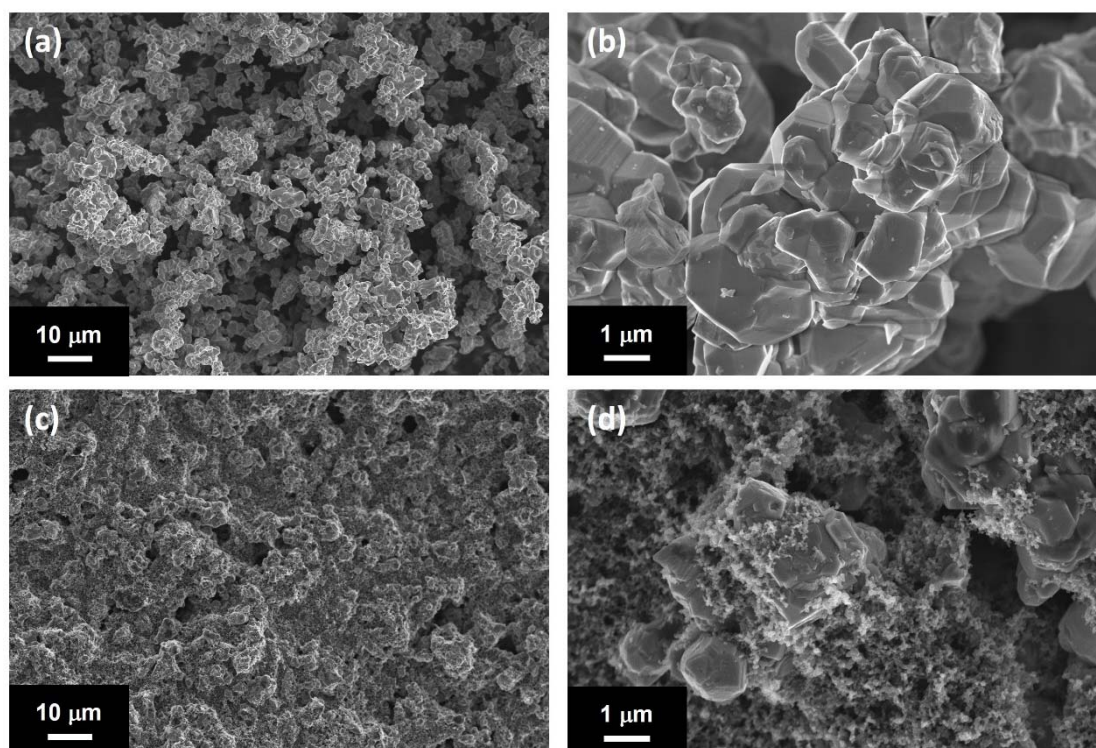

**Figure S4.** FE-SEM images of the LNMO powder and a LNMO electrode: LNMO powder with magnification (a)  $\times 1000$  and (b)  $\times 10000$  and LNMO electrode with magnification (c)  $\times 1000$  and (d)  $\times 10000$ .

LNMO powder consists of 1-5  $\mu\text{m}$  particle-size clusters (**Figures S4a and S4b**). After processing, carbon black appears covering all the electrode surface (**Figure S4c**), generating an electron-conductive matrix to overcome the insulating nature of LNMO. Nevertheless, a closer look to the electrodes (**Figure S4d**) showed that the original LNMO morphology is kept behind the carbon black matrix. No agglomerates were found in the SEM inspection.

**Table S3.** Functional relations between the concentration of the electrode components and the experimental outputs.

| Equation                                                                                                                                                                                                                                         | R <sup>2</sup> (%) |
|--------------------------------------------------------------------------------------------------------------------------------------------------------------------------------------------------------------------------------------------------|--------------------|
| $\text{Viscosity} = -1.73[\text{LNMO}] - 78.19[\text{C65}] - 521.06[\text{CMC}] + 2.24[\text{Binder}] + 1.02[\text{LNMO}][\text{C45}] + 5.98[\text{LNMO}][\text{CMC}] + 0.14[\text{LNMO}][\text{Binder}] + 2.35[\text{C45}][\text{CMC}]$         | 99.79              |
| $\text{Slope} = -0.0077[\text{LNMO}] + 0.09[\text{C65}] - 0.96[\text{CMC}] - 1.09[\text{Binder}] + 0.001[\text{LNMO}][\text{C45}] + 0.01[\text{LNMO}][\text{CMC}] + 0.01[\text{LNMO}][\text{Binder}] - 0.02[\text{C45}][\text{CMC}]$             | 99.57              |
| $\text{Peel strength} = 1.12[\text{LNMO}] + 94.91[\text{C65}] - 1085.85[\text{CMC}] + 438.79[\text{Binder}] - 1.34[\text{LNMO}][\text{C45}] + 11.18[\text{LNMO}][\text{CMC}] - 4.66[\text{LNMO}][\text{Binder}] + 16.95[\text{C45}][\text{CMC}]$ | 95.64              |
| $0.2\text{C capacity} = 1.11[\text{LNMO}] - 33.55[\text{C65}] - 185.39[\text{CMC}] + 32.48[\text{Binder}] + 0.36[\text{LNMO}][\text{C45}] + 1.95[\text{LNMO}][\text{CMC}] - 0.28[\text{LNMO}][\text{Binder}] + 3.29[\text{C45}][\text{CMC}]$     | 39.11              |
| $2\text{C capacity} = -0.38[\text{LNMO}] - 306.02[\text{C65}] - 487.16[\text{CMC}] + 44.40[\text{Binder}] + 3.45[\text{LNMO}][\text{C45}] + 5.09[\text{LNMO}][\text{CMC}] - 0.19[\text{LNMO}][\text{Binder}] + 10.83[\text{C45}][\text{CMC}]$    | 90.57              |
| $1\text{C capacity} = -0.59[\text{LNMO}] + 2.95[\text{C65}] - 449.77[\text{CMC}] - 921.56[\text{Binder}] + 0.26[\text{LNMO}][\text{C45}] - 4.60[\text{LNMO}][\text{CMC}] + 10.29[\text{LNMO}][\text{Binder}] - 5.52[\text{C45}][\text{CMC}]$     | 98.10              |



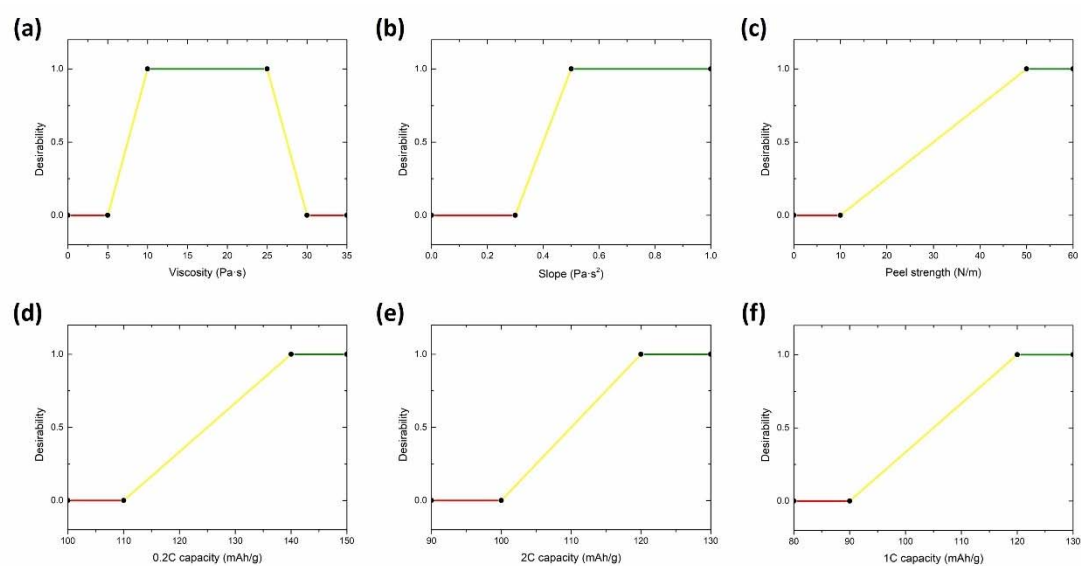

**Figure S5.** Derringer-Suich desirability functions for the different experimental outputs under evaluation:

(a) viscosity, (b) viscosity slope, (c) peel strength, (d) 0.2C capacity, (e) 2C capacity and (f) 1C capacity.



**Table S4.** Desirability of the different samples for each parameter, group of parameters and the global desirability.

| Formulation | Viscosity at<br>10 s <sup>-1</sup> | Viscosity<br>slope | Peel<br>strength | Feasibility | Specific<br>capacity<br>at 0.2C | Specific<br>capacity<br>at 2C | Specific<br>capacity<br>at 1C | Electrochemical<br>performance | Global<br>desirability |
|-------------|------------------------------------|--------------------|------------------|-------------|---------------------------------|-------------------------------|-------------------------------|--------------------------------|------------------------|
| 1           | 0.920                              | 0.204              | 0.670            | 0.774       | 0.609                           | 0.823                         | 0.821                         | 0.891                          | 0.928                  |
| 2           | 0.572                              | 0.195              | 0.272            | 0.647       | 0.574                           | 0.418                         | 0.613                         | 0.819                          | 0.879                  |
| 3           | 1.000                              | 0.105              | 0.185            | 0.580       | 0.601                           | 0.516                         | 0.591                         | 0.834                          | 0.873                  |
| 4           | 1.000                              | 0.498              | 0.372            | 0.782       | 0.633                           | 1.000                         | 0.901                         | 0.917                          | 0.939                  |
| 5           | 1.000                              | 0.342              | 0.561            | 0.801       | 0.553                           | 0.604                         | 0.246                         | 0.761                          | 0.878                  |
| 6           | 1.000                              | 0.893              | 0.488            | 0.876       | 0.531                           | 0.838                         | 0.930                         | 0.883                          | 0.939                  |
| 7           | 1.000                              | 0.794              | 0.864            | 0.950       | 0.6                             | 0.855                         | 0.394                         | 0.830                          | 0.926                  |
| 8           | 1.000                              | 0.462              | 0.550            | 0.827       | 0.621                           | 0.948                         | 0.668                         | 0.884                          | 0.932                  |
| 9           | 1.000                              | 0.639              | 0.522            | 0.852       | 0.643                           | 1.000                         | 0.810                         | 0.910                          | 0.946                  |

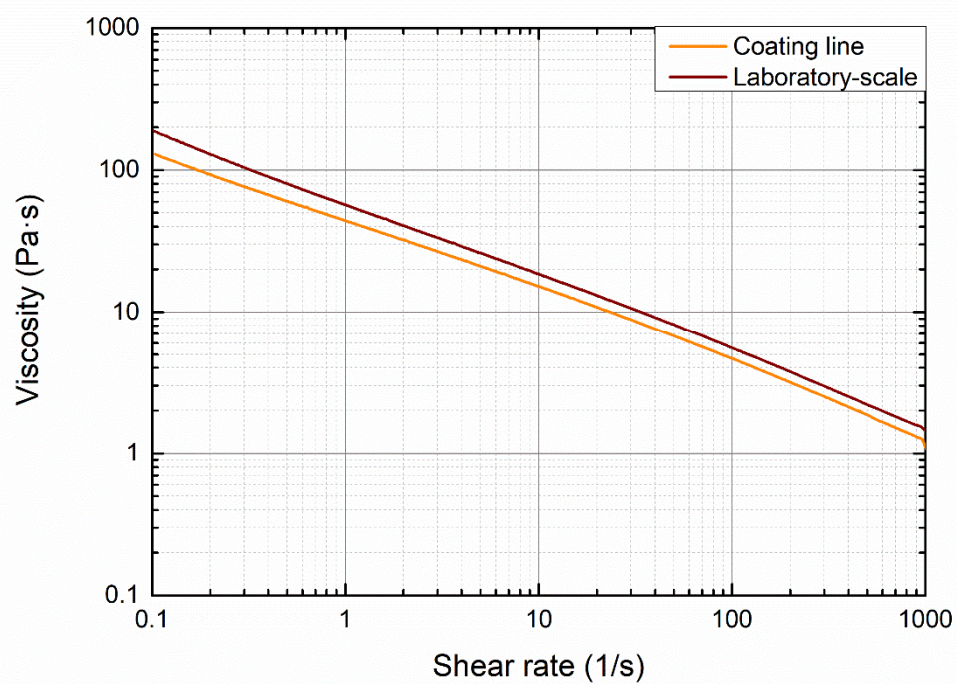

**Figure S6.** Rheological analyses (viscosity vs. shear rate curves) of the laboratory-scale slurry with formulation #10 and slurry prepared for upscaling to the coating line with the same formulation.

As expected based on the regression coefficient for equation 3 (97.83%), there are slight differences between the global desirability values obtained experimentally and the values obtained with equation 3. Both values for each formulation are compared in **Table S5**.

**Table S5.** *Experimental and mathematical desirability values obtained for the 9 formulations in this study.*

| Formulation | Experimental D | Mathematical D |
|-------------|----------------|----------------|
| 1           | 0.928          | 0.930          |
| 2           | 0.879          | 0.882          |
| 3           | 0.873          | 0.867          |
| 4           | 0.939          | 0.933          |
| 5           | 0.878          | 0.884          |
| 6           | 0.939          | 0.944          |
| 7           | 0.926          | 0.924          |
| 8           | 0.932          | 0.943          |
| 9           | 0.946          | 0.932          |

Interestingly, the highest experimental and mathematical desirability values are not obtained with the same formulation: the highest mathematical desirability was obtained with formulation #6. These differences are attributed to experimental errors and, thus, it is better to use the mathematical desirability as the referential parameter to evaluate the formulations.

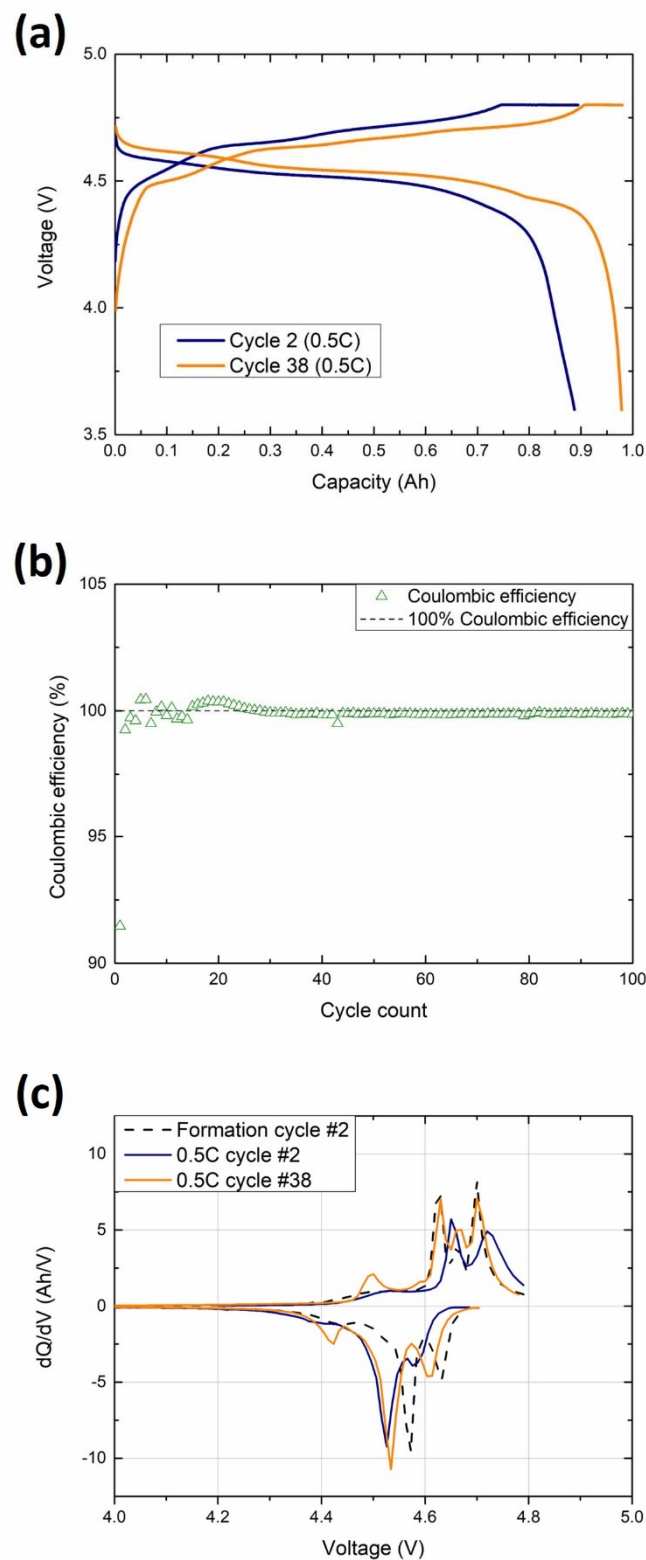

**Figure S7.** (a) Voltage vs. capacity representation of the 2<sup>nd</sup> and the 38<sup>th</sup> cycles with the pouch cells cycled at 0.5C. (b) Coulombic efficiency of the cells subjected to 0.5C C-rate. (c)  $dQ/dV$  vs. voltage representation of the 2<sup>nd</sup> and the 38<sup>th</sup> cycles with the pouch cells cycled at 0.5C.
